# Supplementary material
Source: PubMed Central journal article supplement (PMC8244386)
Supplement: mmc2.pdf [file mmc2.pdf]

| Variable                                                                                                        | Level                                                                         | Overall |              | By HCW |             |         |             | By Gender |             |        |             |
|-----------------------------------------------------------------------------------------------------------------|-------------------------------------------------------------------------------|---------|--------------|--------|-------------|---------|-------------|-----------|-------------|--------|-------------|
|                                                                                                                 |                                                                               | Den.    | N (%)        | HCW    |             | Non-HCW |             | Male      |             | Female |             |
|                                                                                                                 |                                                                               |         |              | Den.   | N (%)       | Den.    | N (%)       | Den.      | N (%)       | Den.   | N (%)       |
| Select all the options that you believe to reduce the spread of COVID-19 infection (Q1)                         | Washing hands                                                                 | 1359    | 1346 (99.0%) | 599    | 593 (99.0%) | 664     | 658 (99.1%) | 559       | 553 (98.9%) | 685    | 679 (99.1%) |
|                                                                                                                 | Social distancing                                                             | 1359    | 1322 (97.3%) | 599    | 584 (97.5%) | 664     | 647 (97.4%) | 559       | 551 (98.6%) | 685    | 666 (97.2%) |
|                                                                                                                 | Wearing a mask                                                                | 1359    | 1218 (89.6%) | 599    | 540 (90.2%) | 664     | 593 (89.3%) | 559       | 507 (90.7%) | 685    | 609 (88.9%) |
| Would you be more willing to perform chest compressions if you had gloves to wear? (Q5.1)                       | No, that would not change the willingness I indicated above                   | 1324    | 708 (53.5%)  | 600    | 369 (61.5%) | 664     | 308 (46.4%) | 559       | 315 (56.4%) | 686    | 352 (51.3%) |
|                                                                                                                 | Yes, for everyone                                                             | 1324    | 421 (31.8%)  | 600    | 158 (26.3%) | 664     | 241 (36.3%) | 559       | 161 (28.8%) | 686    | 233 (34.0%) |
|                                                                                                                 | Yes, but only for the family member/familiar person                           | 1324    | 99 (7.5%)    | 600    | 25 (4.2%)   | 664     | 69 (10.4%)  | 559       | 45 (8.1%)   | 686    | 46 (6.7%)   |
|                                                                                                                 | Yes, but only for the stranger/unfamiliar person                              | 1324    | 96 (7.3%)    | 600    | 48 (8.0%)   | 664     | 46 (6.9%)   | 559       | 38 (6.8%)   | 686    | 55 (8.0%)   |
| Would you be more willing to perform chest compressions if you had a facemask on? (Q5.2)                        | No, that would not change the willingness I indicated above                   | 1324    | 487 (36.8%)  | 600    | 217 (36.2%) | 664     | 247 (37.2%) | 559       | 224 (40.1%) | 686    | 232 (33.8%) |
|                                                                                                                 | Yes, for everyone                                                             | 1324    | 564 (42.6%)  | 600    | 256 (42.7%) | 664     | 281 (42.3%) | 559       | 222 (39.7%) | 686    | 308 (44.9%) |
|                                                                                                                 | Yes, but only for the family member/familiar person                           | 1324    | 97 (7.3%)    | 600    | 34 (5.7%)   | 664     | 57 (8.6%)   | 559       | 43 (7.7%)   | 686    | 45 (6.6%)   |
|                                                                                                                 | Yes, but only for the stranger/unfamiliar person                              | 1324    | 176 (13.3%)  | 600    | 93 (15.5%)  | 664     | 79 (11.9%)  | 559       | 70 (12.5%)  | 686    | 101 (14.7%) |
| Would you be more willing to perform chest compressions if there was a covering over the victim's mouth? (Q5.3) | No, that would not change the willingness I indicated above                   | 1324    | 485 (36.6%)  | 600    | 217 (36.2%) | 664     | 245 (36.9%) | 559       | 224 (40.1%) | 686    | 230 (33.5%) |
|                                                                                                                 | Yes, for everyone                                                             | 1324    | 569 (43.0%)  | 600    | 255 (42.5%) | 664     | 285 (42.9%) | 559       | 226 (40.4%) | 686    | 306 (44.6%) |
|                                                                                                                 | Yes, but only for the family member/familiar person                           | 1324    | 82 (6.2%)    | 600    | 30 (5.0%)   | 664     | 48 (7.2%)   | 559       | 36 (6.4%)   | 686    | 40 (5.8%)   |
|                                                                                                                 | Yes, but only for the stranger/unfamiliar person                              | 1324    | 188 (14.2%)  | 600    | 98 (16.3%)  | 664     | 86 (13.0%)  | 559       | 73 (13.1%)  | 686    | 110 (16.0%) |
| Would you be more willing to provide rescue breaths if there was a face shield for the patient? (Q8)            | Yes for both the stranger/unfamiliar person and family member/familiar person | 1265    | 632 (50.0%)  | 600    | 267 (44.5%) | 664     | 365 (55.0%) | 559       | 259 (46.3%) | 686    | 368 (53.6%) |
|                                                                                                                 | Yes, but only for the family member/familiar person                           | 1265    | 172 (13.6%)  | 600    | 79 (13.2%)  | 664     | 93 (14.0%)  | 559       | 67 (12.0%)  | 686    | 100 (14.6%) |
|                                                                                                                 | Yes, but only for the stranger/unfamiliar person                              | 1265    | 175 (13.8%)  | 600    | 91 (15.2%)  | 664     | 84 (12.7%)  | 559       | 86 (15.4%)  | 686    | 87 (12.7%)  |
|                                                                                                                 | No, that would not change the willingness I indicated above                   | 1265    | 286 (22.6%)  | 600    | 163 (27.2%) | 664     | 122 (18.4%) | 559       | 147 (26.3%) | 686    | 131 (19.1%) |
| Methods you believe COVID-19 can spread from victim to rescuer (Q11)                                            | Spread: It cannot spread                                                      | 1265    | 4 (0.3%)     | 600    | 2 (0.3%)    | 664     | 2 (0.3%)    | 559       | 0 (0%)      | 686    | 3 (0.4%)    |
|                                                                                                                 | Spread: Direct contact with a victims skin                                    | 1265    | 437 (34.5%)  | 600    | 193 (32.2%) | 664     | 244 (36.7%) | 559       | 220 (39.4%) | 686    | 206 (30.0%) |
|                                                                                                                 | Spread: Direct contact with a victims mouth or saliva                         | 1265    | 1209 (95.6%) | 600    | 564 (94.0%) | 664     | 645 (97.1%) | 559       | 528 (94.5%) | 686    | 662 (96.5%) |
|                                                                                                                 | Spread: Spread from the victims breath going into the air                     | 1265    | 1105 (87.4%) | 600    | 547 (91.2%) | 664     | 557 (83.9%) | 559       | 498 (89.1%) | 686    | 590 (86.0%) |
| What would make you feel more likely to do CPR now (during the COVID pandemic)? (Q12)                           | Nothing, since the pandemic has not changed my response                       | 1265    | 286 (22.6%)  | 600    | 140 (23.3%) | 664     | 146 (22.0%) | 559       | 148 (26.5%) | 686    | 133 (19.4%) |
|                                                                                                                 | Having a covering available to cover the victims mouth and nose               | 1265    | 831 (65.7%)  | 600    | 378 (63.0%) | 664     | 453 (68.2%) | 559       | 344 (61.5%) | 686    | 475 (69.2%) |
|                                                                                                                 | Having gloves available for myself                                            | 1265    | 542 (42.8%)  | 600    | 228 (38.0%) | 664     | 313 (47.1%) | 559       | 227 (40.6%) | 686    | 303 (44.2%) |
|                                                                                                                 | Having a mask available for myself                                            | 1265    | 712 (56.3%)  | 600    | 357 (59.5%) | 664     | 355 (53.5%) | 559       | 300 (53.7%) | 686    | 402 (58.6%) |
|                                                                                                                 | More education                                                                | 1265    | 707 (55.9%)  | 600    | 277 (46.2%) | 664     | 430 (64.8%) | 559       | 267 (47.8%) | 686    | 430 (62.7%) |

**Supplementary Table 1: Results for categorical survey questions**

Den, denominator (number of responses with non-missing data); HCW, healthcare worker; N, number; Q, survey question number (see Appendix A)

| Analysis Group | Variable                                        | Before (or Without PPE) <sup>a</sup> , mean (SD) | During (or With PPE) <sup>a</sup> , mean (SD) | Difference: During - Before |                |         |
|----------------|-------------------------------------------------|--------------------------------------------------|-----------------------------------------------|-----------------------------|----------------|---------|
|                |                                                 |                                                  |                                               | Mean (SD)                   | 95% CI         | P value |
| <b>Overall</b> | Call 911 – Stranger (Q2)                        | 97.4 (9.3)                                       | 96.5 (11.6)                                   | -0.8 (9.7)                  | (-1.4, -0.3)   | 0.002   |
|                | Call 911 – Family (Q2)                          | 99.2 (6.4)                                       | 99.2 (5.1)                                    | 0.0 (4.9)                   | (-0.2, 0.3)    | 0.713   |
|                | Check for breathing or a pulse – Stranger (Q3)  | 93.8 (14.6)                                      | 83.0 (25.8)                                   | -10.7 (20.8)                | (-11.8, -9.6)  | <0.001  |
|                | Check for breathing or a pulse – Family (Q3)    | 98.9 (6.7)                                       | 97.7 (9.0)                                    | -1.2 (7.5)                  | (-1.6, -0.8)   | <0.001  |
|                | Chest compression – Stranger (Q4)               | 90.6 (20.2)                                      | 76.3 (30.6)                                   | -14.3 (24.3)                | (-15.6, -13.0) | <0.001  |
|                | Chest compression – Family (Q4)                 | 97.0 (12.1)                                      | 95.3 (14.4)                                   | -1.6 (8.8)                  | (-2.1, -1.1)   | <0.001  |
|                | Mouth-to-mouth rescue breaths – Stranger (Q7)   | 59.4 (36.5)                                      | 39.9 (36.6)                                   | -19.5 (26.0)                | (-20.9, -18.1) | <0.001  |
|                | Mouth-to-mouth rescue breaths – Family (Q7)     | 89.7 (22.6)                                      | 84.2 (27.7)                                   | -5.5 (16.9)                 | (-6.4, -4.6)   | <0.001  |
|                | AED – Stranger (Q9)                             | 93.7 (16.4)                                      | 88.9 (22.8)                                   | -4.8 (15.4)                 | (-5.7, -4.0)   | <0.001  |
|                | AED – Family (Q9)                               | 97.2 (11.2)                                      | 96.3 (12.4)                                   | -0.9 (7.2)                  | (-1.3, -0.5)   | <0.001  |
|                | With PPE: Chest compression – Stranger (Q4, Q6) | 77.4 (31.1)                                      | 85.7 (27.2)                                   | 8.3 (17.9)                  | (7.2, 9.5)     | <0.001  |
|                | With PPE: Chest compression – Family (Q4, Q6)   | 95.2 (15.2)                                      | 96.5 (12.9)                                   | 1.4 (8.8)                   | (0.8, 1.9)     | <0.001  |
| <b>HCW</b>     | Call 911 – Stranger (Q2)                        | 99.1 (6.7)                                       | 98.3 (9.0)                                    | -0.8 (8.6)                  | (-1.5, -0.1)   | 0.029   |
|                | Call 911 – Family (Q2)                          | 99.7 (5.1)                                       | 99.8 (1.3)                                    | 0.2 (5.2)                   | (-0.2, 0.6)    | 0.395   |
|                | Check for breathing or a pulse – Stranger (Q3)  | 97.3 (9.7)                                       | 87.7 (23.9)                                   | -9.6 (21.4)                 | (-11.3, -7.9)  | <0.001  |
|                | Check for breathing or a pulse – Family (Q3)    | 99.7 (4.6)                                       | 99.2 (5.3)                                    | -0.5 (6.3)                  | (-1.0, 0.0)    | 0.068   |
|                | Chest compression – Stranger (Q4)               | 96.7 (11.9)                                      | 78.9 (30.2)                                   | -17.8 (28.1)                | (-20.1, -15.5) | <0.001  |
|                | Chest compression – Family (Q4)                 | 99.6 (4.6)                                       | 98.3 (8.3)                                    | -1.3 (9.0)                  | (-2.0, -0.6)   | <0.001  |
|                | Mouth-to-mouth rescue breaths – Stranger (Q7)   | 55.6 (39.4)                                      | 35.6 (37.7)                                   | -20.0 (27.7)                | (-22.2, -17.8) | <0.001  |
|                | Mouth-to-mouth rescue breaths – Family (Q7)     | 89.9 (24.5)                                      | 85.1 (28.8)                                   | -4.8 (17.8)                 | (-6.2, -3.4)   | <0.001  |
|                | AED – Stranger (Q9)                             | 98.3 (9.9)                                       | 94.7 (17.4)                                   | -3.7 (15.3)                 | (-4.9, -2.4)   | <0.001  |
|                | AED – Family (Q9)                               | 99.7 (4.7)                                       | 99.2 (5.4)                                    | -0.5 (6.5)                  | (-1.0, 0.1)    | 0.081   |
|                | With PPE: Chest compression – Stranger (Q4, Q6) | 81.6 (30.2)                                      | 89.3 (26.0)                                   | 7.7 (18.1)                  | (5.9, 9.6)     | <0.001  |
|                | With PPE: Chest compression – Family (Q4, Q6)   | 98.5 (8.2)                                       | 99.3 (6.2)                                    | 0.8 (4.9)                   | (0.3, 1.3)     | 0.002   |
| <b>Non-HCW</b> | Call 911 – Stranger (Q2)                        | 95.8 (11.1)                                      | 95.2 (13.1)                                   | -0.7 (10.1)                 | (-1.4, 0.1)    | 0.088   |
|                | Call 911 – Family (Q2)                          | 98.7 (7.6)                                       | 98.8 (6.5)                                    | 0.1 (4.3)                   | (-0.2, 0.4)    | 0.583   |
|                | Check for breathing or a pulse – Stranger (Q3)  | 90.7 (17.0)                                      | 79.2 (26.6)                                   | -11.5 (20.3)                | (-13.0, -9.9)  | <0.001  |
|                | Check for breathing or a pulse – Family (Q3)    | 98.4 (7.3)                                       | 96.6 (10.4)                                   | -1.8 (8.2)                  | (-2.4, -1.2)   | <0.001  |
|                | Chest compression – Stranger (Q4)               | 85.5 (24.1)                                      | 74.6 (30.5)                                   | -10.9 (19.1)                | (-12.4, -9.5)  | <0.001  |
|                | Chest compression – Family (Q4)                 | 94.8 (15.3)                                      | 93.0 (17.5)                                   | -1.9 (8.8)                  | (-2.5, -1.2)   | <0.001  |
|                | Mouth-to-mouth rescue breaths – Stranger (Q7)   | 62.9 (33.1)                                      | 43.7 (35.2)                                   | -19.3 (24.2)                | (-21.1, -17.4) | <0.001  |
|                | Mouth-to-mouth rescue breaths – Family (Q7)     | 89.7 (20.7)                                      | 83.6 (26.4)                                   | -6.1 (15.9)                 | (-7.3, -4.9)   | <0.001  |
|                | AED – Stranger (Q9)                             | 89.6 (19.7)                                      | 83.7 (25.6)                                   | -5.9 (15.3)                 | (-7.0, -4.7)   | <0.001  |
|                | AED – Family (Q9)                               | 95.1 (14.4)                                      | 93.8 (15.8)                                   | -1.3 (7.9)                  | (-1.9, -0.7)   | <0.001  |
|                | With PPE: Chest compression – Stranger (Q4, Q6) | 74.8 (31.1)                                      | 83.9 (27.1)                                   | 9.1 (18.2)                  | (7.5, 10.6)    | <0.001  |
|                | With PPE: Chest compression – Family (Q4, Q6)   | 92.9 (18.0)                                      | 94.8 (15.1)                                   | 1.9 (11.0)                  | (1.0, 2.8)     | <0.001  |

|                                                          |                                                    |                          |             |              |                |              |        |
|----------------------------------------------------------|----------------------------------------------------|--------------------------|-------------|--------------|----------------|--------------|--------|
| <b>Male</b>                                              | Call 911 – Stranger (Q2)                           | 97.0 (10.0)              | 96.5 (11.9) | -0.5 (10.5)  | (-1.4, 0.3)    | 0.232        |        |
|                                                          | Call 911 – Family (Q2)                             | 98.8 (8.1)               | 99.0 (6.5)  | 0.2 (4.7)    | (-0.2, 0.6)    | 0.245        |        |
|                                                          | Check for breathing or a pulse – Stranger (Q3)     | 94.2 (13.5)              | 83.4 (26.7) | -10.7 (21.6) | (-12.5, -9.0)  | <0.001       |        |
|                                                          | Check for breathing or a pulse – Family (Q3)       | 99.0 (5.6)               | 97.3 (9.9)  | -1.7 (8.8)   | (-2.5, -1.0)   | <0.001       |        |
|                                                          | Chest compression – Stranger (Q4)                  | 91.1 (20.2)              | 76.2 (32.0) | -14.9 (25.6) | (-17.0, -12.8) | <0.001       |        |
|                                                          | Chest compression – Family (Q4)                    | 96.6 (13.4)              | 94.3 (16.9) | -2.3 (10.7)  | (-3.2, -1.4)   | <0.001       |        |
|                                                          | Mouth-to-mouth rescue breaths – Stranger (Q7)      | 59.6 (37.4)              | 40.4 (37.8) | -19.1 (26.0) | (-21.3, -17.0) | <0.001       |        |
|                                                          | Mouth-to-mouth rescue breaths – Family (Q7)        | 88.7 (24.3)              | 83.1 (29.7) | -5.6 (16.5)  | (-7.0, -4.2)   | <0.001       |        |
|                                                          | AED – Stranger (Q9)                                | 94.3 (15.7)              | 89.1 (23.2) | -5.1 (15.6)  | (-6.4, -3.8)   | <0.001       |        |
|                                                          | AED – Family (Q9)                                  | 97.7 (10.8)              | 96.6 (12.2) | -1.0 (7.7)   | (-1.7, -0.4)   | 0.002        |        |
|                                                          | With PPE: Chest compression – Stranger (Q4, Q6)    | 77.5 (32.2)              | 85.9 (26.9) | 8.4 (18.7)   | (6.6, 10.2)    | <0.001       |        |
|                                                          | With PPE: Chest compression – Family (Q4, Q6)      | 94.2 (17.6)              | 96.5 (13.6) | 2.3 (11.0)   | (1.2, 3.4)     | <0.001       |        |
|                                                          | <b>Female</b>                                      | Call 911 – Stranger (Q2) | 98.3 (6.0)  | 97.3 (9.4)   | -1.0 (7.6)     | (-1.6, -0.4) | <0.001 |
|                                                          |                                                    | Call 911 – Family (Q2)   | 99.6 (3.3)  | 99.5 (2.8)   | -0.1 (2.9)     | (-0.3, 0.1)  | 0.382  |
| Check for breathing or a pulse – Stranger (Q3)           |                                                    | 94.1 (13.6)              | 83.6 (24.5) | -10.5 (19.8) | (-12.0, -9.1)  | <0.001       |        |
| Check for breathing or a pulse – Family (Q3)             |                                                    | 99.1 (5.6)               | 98.2 (7.3)  | -0.9 (4.7)   | (-1.2, -0.5)   | <0.001       |        |
| Chest compression – Stranger (Q4)                        |                                                    | 91.4 (18.6)              | 77.7 (28.4) | -13.7 (22.4) | (-15.4, -12.0) | <0.001       |        |
| Chest compression – Family (Q4)                          |                                                    | 97.7 (9.5)               | 96.5 (11.2) | -1.1 (5.9)   | (-1.6, -0.7)   | <0.001       |        |
| Mouth-to-mouth rescue breaths – Stranger (Q7)            |                                                    | 59.8 (35.5)              | 39.6 (35.5) | -20.2 (25.4) | (-22.1, -18.3) | <0.001       |        |
| Mouth-to-mouth rescue breaths – Family (Q7)              |                                                    | 90.8 (21.1)              | 85.3 (25.7) | -5.4 (16.3)  | (-6.7, -4.2)   | <0.001       |        |
| AED – Stranger (Q9)                                      |                                                    | 94.2 (15.0)              | 89.5 (21.3) | -4.7 (14.7)  | (-5.8, -3.6)   | <0.001       |        |
| AED – Family (Q9)                                        |                                                    | 97.2 (10.3)              | 96.3 (12.0) | -0.9 (5.6)   | (-1.4, -0.5)   | <0.001       |        |
| With PPE: Chest compression – Stranger (Q4, Q6)          |                                                    | 78.6 (29.1)              | 87.0 (26.2) | 8.4 (17.6)   | (6.8, 10.0)    | <0.001       |        |
| With PPE: Chest compression – Family (Q4, Q6)            |                                                    | 96.1 (12.3)              | 96.9 (11.3) | 0.8 (6.9)    | (0.2, 1.4)     | 0.013        |        |
| <b>Location of Residence, &lt; 500 Cases per million</b> |                                                    | Call 911 – Stranger (Q2) | 93.4 (14.4) | 89.5 (21.3)  | -3.9 (23.0)    | (-8.8, 0.9)  | 0.107  |
|                                                          |                                                    | Call 911 – Family (Q2)   | 97.8 (7.8)  | 98.7 (3.6)   | 0.9 (7.1)      | (-0.6, 2.4)  | 0.231  |
|                                                          | Check for breathing or a pulse – Stranger (Q3)     | 89.3 (17.4)              | 70.4 (32.6) | -18.9 (28.5) | (-24.8, -12.9) | <0.001       |        |
|                                                          | Check for breathing or a pulse – Family (Q3)       | 97.5 (9.3)               | 95.3 (13.5) | -2.2 (13.0)  | (-4.9, 0.5)    | 0.108        |        |
|                                                          | Chest compression – Stranger (Q4)                  | 80.1 (29.7)              | 60.7 (36.7) | -19.4 (27.7) | (-25.2, -13.6) | <0.001       |        |
|                                                          | Chest compression – Family (Q4)                    | 91.7 (21.6)              | 87.1 (26.1) | -4.6 (16.3)  | (-8.0, -1.2)   | 0.008        |        |
|                                                          | Mouth-to-mouth rescue breaths – Stranger (Q7)      | 55.0 (38.2)              | 32.2 (34.8) | -22.8 (30.7) | (-29.2, -16.4) | <0.001       |        |
|                                                          | Mouth-to-mouth rescue breaths – Family (Q7)        | 86.2 (24.2)              | 77.4 (28.5) | -8.8 (18.0)  | (-12.6, -5.1)  | <0.001       |        |
|                                                          | AED – Stranger (Q9)                                | 87.2 (20.7)              | 78.5 (27.5) | -8.7 (20.6)  | (-13.0, -4.4)  | <0.001       |        |
|                                                          | AED – Family (Q9)                                  | 93.9 (17.0)              | 93.3 (15.3) | -0.6 (13.6)  | (-3.4, 2.3)    | 0.681        |        |
|                                                          | With PPE: Chest compression – Stranger (Q4, Q6)    | 58.7 (37.6)              | 74.2 (35.2) | 15.5 (27.9)  | (8.8, 22.2)    | <0.001       |        |
|                                                          | With PPE: Chest compression – Family (Q4, Q6)      | 85.5 (28.4)              | 90.4 (22.0) | 4.9 (19.6)   | (0.2, 9.6)     | 0.041        |        |
|                                                          | <b>Location of Residence, 500 – 2000 Cases per</b> | Call 911 – Stranger (Q2) | 97.5 (8.8)  | 97.1 (9.8)   | -0.3 (7.3)     | (-0.8, 0.1)  | 0.168  |
|                                                          |                                                    | Call 911 – Family (Q2)   | 99.4 (5.5)  | 99.4 (4.2)   | -0.0 (4.1)     | (-0.3, 0.3)  | 0.993  |
| Check for breathing or a pulse – Stranger (Q3)           |                                                    | 93.3 (15.0)              | 83.0 (25.0) | -10.3 (19.8) | (-11.7, -9.0)  | <0.001       |        |

|                                                |                                                 |             |             |              |                |        |
|------------------------------------------------|-------------------------------------------------|-------------|-------------|--------------|----------------|--------|
| million                                        | Check for breathing or a pulse – Family (Q3)    | 99.0 (6.4)  | 97.9 (8.1)  | -1.1 (7.0)   | (-1.5, -0.6)   | <0.001 |
|                                                | Chest compression – Stranger (Q4)               | 90.3 (20.1) | 76.3 (29.3) | -13.9 (22.9) | (-15.5, -12.4) | <0.001 |
|                                                | Chest compression – Family (Q4)                 | 97.1 (11.3) | 96.0 (12.5) | -1.2 (7.3)   | (-1.7, -0.7)   | <0.001 |
|                                                | Mouth-to-mouth rescue breaths – Stranger (Q7)   | 57.0 (35.9) | 38.8 (36.0) | -18.3 (24.1) | (-19.9, -16.6) | <0.001 |
|                                                | Mouth-to-mouth rescue breaths – Family (Q7)     | 89.6 (22.3) | 84.8 (26.6) | -4.8 (16.0)  | (-5.9, -3.7)   | <0.001 |
|                                                | AED – Stranger (Q9)                             | 93.4 (17.0) | 88.3 (23.1) | -5.0 (15.4)  | (-6.1, -4.0)   | <0.001 |
|                                                | AED – Family (Q9)                               | 97.2 (11.4) | 96.1 (12.9) | -1.1 (6.9)   | (-1.6, -0.6)   | <0.001 |
|                                                | With PPE: Chest compression – Stranger (Q4, Q6) | 77.0 (30.1) | 85.8 (26.5) | 8.8 (16.9)   | (7.4, 10.1)    | <0.001 |
|                                                | With PPE: Chest compression – Family (Q4, Q6)   | 95.6 (13.5) | 97.0 (11.3) | 1.4 (7.7)    | (0.8, 2.1)     | <0.001 |
| Location of Residence, >2000 Cases per million | Call 911 – Stranger (Q2)                        | 98.2 (9.0)  | 97.6 (9.8)  | -0.6 (6.8)   | (-1.3, 0.2)    | 0.122  |
|                                                | Call 911 – Family (Q2)                          | 99.1 (7.4)  | 99.2 (6.4)  | 0.1 (4.5)    | (-0.4, 0.6)    | 0.684  |
|                                                | Check for breathing or a pulse – Stranger (Q3)  | 96.2 (11.2) | 87.6 (23.9) | -8.6 (19.9)  | (-10.8, -6.4)  | <0.001 |
|                                                | Check for breathing or a pulse – Family (Q3)    | 99.4 (4.4)  | 98.3 (7.5)  | -1.1 (6.0)   | (-1.8, -0.5)   | <0.001 |
|                                                | Chest compression – Stranger (Q4)               | 95.0 (15.3) | 82.1 (29.3) | -12.9 (25.0) | (-15.6, -10.1) | <0.001 |
|                                                | Chest compression – Family (Q4)                 | 98.4 (8.5)  | 96.6 (12.6) | -1.8 (9.5)   | (-2.9, -0.8)   | <0.001 |
|                                                | Mouth-to-mouth rescue breaths – Stranger (Q7)   | 67.0 (36.5) | 45.5 (38.2) | -21.5 (27.7) | (-24.5, -18.4) | <0.001 |
|                                                | Mouth-to-mouth rescue breaths – Family (Q7)     | 91.5 (22.4) | 85.7 (28.6) | -5.8 (17.3)  | (-7.7, -3.9)   | <0.001 |
|                                                | AED – Stranger (Q9)                             | 96.3 (13.0) | 93.2 (18.9) | -3.1 (13.0)  | (-4.5, -1.7)   | <0.001 |
|                                                | AED – Family (Q9)                               | 98.3 (7.9)  | 97.9 (8.9)  | -0.4 (3.9)   | (-0.8, 0.0)    | 0.071  |
|                                                | With PPE: Chest compression – Stranger (Q4, Q6) | 84.8 (28.2) | 90.7 (23.6) | 5.9 (17.1)   | (3.7, 8.1)     | <0.001 |
|                                                | With PPE: Chest compression – Family (Q4, Q6)   | 97.4 (11.3) | 97.8 (10.6) | 0.3 (6.6)    | (-0.5, 1.2)    | 0.428  |

**Supplementary Table 2: Results of Paired T-test analyses, examining changes in willingness to intervene for OHCA (a) during and prior to the COVID pandemic, and (b) with PPE available**

<sup>a</sup> With the exception of the “With PPE: Chest compression” analyses (which show changes in willingness to perform chest compressions if PPE was available”, all other analyses compare changes in willingness to intervene during the COVID-19 pandemic (in comparison to prior time periods)

Q, survey question number (see Appendix A); HCW, healthcare worker; PPE, personal protective equipment; AED, automated external defibrillator

| Subgroup                                      | Variable                                        | Yes <sup>a</sup>                          | No <sup>a</sup>                           | Yes - No                    |                                                      |
|-----------------------------------------------|-------------------------------------------------|-------------------------------------------|-------------------------------------------|-----------------------------|------------------------------------------------------|
|                                               |                                                 | Mean Change (95% CI)<br>(during - before) | Mean Change (95% CI)<br>(during - before) | Mean Difference<br>(95% CI) | Adjusted Mean<br>Difference <sup>b</sup><br>(95% CI) |
| <b>HCW (vs non-HCW)</b>                       | Call 911 – Stranger (Q2)                        | -0.76 (-1.45 , -0.08)                     | -0.67 (-1.44 , 0.10)                      | -0.09 (-1.12 , 0.94)        | 0.78 (-0.24 , 1.80)                                  |
|                                               | Call 911 – Family (Q2)                          | 0.18 (-0.24 , 0.60)                       | 0.09 (-0.24 , 0.42)                       | 0.09 (-0.44 , 0.62)         | 0.56 (0.17 , 0.94)                                   |
|                                               | Check for breathing or a pulse – Stranger (Q3)  | -9.58 (-11.30 , -7.87)                    | -11.47 (-13.01 , -9.92)                   | 1.88 (-0.42 , 4.18)         | 1.64 (-0.72 , 4.01)                                  |
|                                               | Check for breathing or a pulse – Family (Q3)    | -0.47 (-0.98 , 0.04)                      | -1.80 (-2.43 , -1.17)                     | 1.33 (0.52 , 2.13)          | 1.71 (0.91 , 2.51)                                   |
|                                               | Chest compression – Stranger (Q4)               | -17.80 (-20.05 , -15.54)                  | -10.91 (-12.37 , -9.46)                   | -6.88 (-9.57 , -4.20)       | -6.58 (-9.32 , -3.84)                                |
|                                               | Chest compression – Family (Q4)                 | -1.32 (-2.04 , -0.60)                     | -1.86 (-2.53 , -1.19)                     | 0.54 (-0.44 , 1.52)         | 0.89 (-0.11 , 1.88)                                  |
|                                               | Mouth-to-mouth rescue breaths – Stranger (Q7)   | -20.00 (-22.22 , -17.78)                  | -19.27 (-21.12 , -17.43)                  | -0.73 (-3.61 , 2.16)        | -2.57 (-5.26 , 0.13)                                 |
|                                               | Mouth-to-mouth rescue breaths – Family (Q7)     | -4.79 (-6.22 , -3.37)                     | -6.11 (-7.31 , -4.90)                     | 1.31 (-0.55 , 3.18)         | 1.32 (-0.53 , 3.17)                                  |
|                                               | AED – Stranger (Q9)                             | -3.66 (-4.89 , -2.43)                     | -5.88 (-7.04 , -4.71)                     | 2.22 (0.52 , 3.91)          | 2.17 (0.41 , 3.92)                                   |
|                                               | AED – Family (Q9)                               | -0.46 (-0.98 , 0.06)                      | -1.35 (-1.95 , -0.75)                     | 0.89 (0.10 , 1.68)          | 1.39 (0.59 , 2.20)                                   |
|                                               | With PPE: Chest compression – Stranger (Q4, Q6) | 7.73 (5.91 , 9.56)                        | 9.07 (7.51 , 10.62)                       | -1.33 (-3.73 , 1.06)        | 0.68 (-1.40 , 2.76)                                  |
| With PPE: Chest compression – Family (Q4, Q6) | 0.79 (0.29 , 1.28)                              | 1.90 (0.97 , 2.84)                        | -1.11 (-2.17 , -0.06)                     | 0.78 (-0.21 , 1.77)         |                                                      |
| <b>Male (vs Female)</b>                       | Call 911 – Stranger (Q2)                        | -0.53 (-1.40 , 0.34)                      | -1.02 (-1.59 , -0.45)                     | 0.49 (-0.55 , 1.53)         | 0.16 (-0.82 , 1.15)                                  |
|                                               | Call 911 – Family (Q2)                          | 0.23 (-0.16 , 0.63)                       | -0.10 (-0.32 , 0.12)                      | 0.33 (-0.12 , 0.78)         | 0.04 (-0.31 , 0.39)                                  |
|                                               | Check for breathing or a pulse – Stranger (Q3)  | -10.75 (-12.54 , -8.95)                   | -10.55 (-12.03 , -9.07)                   | -0.20 (-2.52 , 2.12)        | -0.21 (-2.51 , 2.09)                                 |
|                                               | Check for breathing or a pulse – Family (Q3)    | -1.73 (-2.46 , -1.00)                     | -0.87 (-1.23 , -0.52)                     | -0.86 (-1.67 , -0.05)       | -0.87 (-1.64 , -0.10)                                |
|                                               | Chest compression – Stranger (Q4)               | -14.93 (-17.05 , -12.80)                  | -13.71 (-15.39 , -12.03)                  | -1.22 (-3.92 , 1.49)        | -1.23 (-3.90 , 1.44)                                 |
|                                               | Chest compression – Family (Q4)                 | -2.32 (-3.21 , -1.43)                     | -1.14 (-1.59 , -0.70)                     | -1.18 (-2.17 , -0.18)       | -1.19 (-2.13 , -0.25)                                |
|                                               | Mouth-to-mouth rescue breaths – Stranger (Q7)   | -19.13 (-21.30 , -16.97)                  | -20.17 (-22.08 , -18.27)                  | 1.04 (-1.83 , 3.91)         | 0.99 (-1.71 , 3.69)                                  |
|                                               | Mouth-to-mouth rescue breaths – Family (Q7)     | -5.60 (-6.97 , -4.22)                     | -5.45 (-6.67 , -4.22)                     | -0.15 (-1.99 , 1.68)        | -0.19 (-2.02 , 1.65)                                 |
|                                               | AED – Stranger (Q9)                             | -5.12 (-6.42 , -3.82)                     | -4.66 (-5.76 , -3.55)                     | -0.46 (-2.15 , 1.23)        | -0.47 (-2.16 , 1.22)                                 |
|                                               | AED – Family (Q9)                               | -1.02 (-1.66 , -0.38)                     | -0.94 (-1.36 , -0.52)                     | -0.08 (-0.84 , 0.69)        | -0.06 (-0.80 , 0.68)                                 |
|                                               | With PPE: Chest compression – Stranger (Q4, Q6) | 8.39 (6.56 , 10.22)                       | 8.40 (6.84 , 9.97)                        | -0.01 (-2.40 , 2.38)        | -0.34 (-2.41 , 1.72)                                 |
| With PPE: Chest compression – Family (Q4, Q6) | 2.30 (1.23 , 3.37)                              | 0.78 (0.16 , 1.39)                        | 1.53 (0.29 , 2.76)                        | 0.88 (-0.10 , 1.86)         |                                                      |

**Supplementary Table 3: Comparison of Differences in Changes in Willingness to Intervene between Subgroups**

<sup>a</sup> “Yes” refers to HCW and Male categories; “No” refers to non-HCW and female categories

<sup>b</sup> Adjusted for baseline willingness

Q, survey question number (see Appendix A); HCW, healthcare worker; PPE, personal protective equipment; AED, automated external defibrillator

| Analysis Group | Age Category | Response Before COVID-19 Pandemic |                    | Response During COVID-19 Pandemic <sup>a</sup> |                   |             | P value for Bowker's test | Shift from baseline <sup>b</sup> |              |
|----------------|--------------|-----------------------------------|--------------------|------------------------------------------------|-------------------|-------------|---------------------------|----------------------------------|--------------|
|                |              |                                   |                    | Less Likely                                    | Same for an adult | More Likely |                           | N (%)                            |              |
| <b>Overall</b> | Children     | Less likely                       | 39 (3.1%)          | 34 (2.7%)                                      | 5 (0.4%)          | 0 (0.0%)    | <0.001                    | Decreased willingness            | 88 (7.0%)    |
|                |              | Same for an adult                 | 901 (71.2%)        | 28 (2.2%)                                      | 804 (63.6%)       | 69 (5.5%)   |                           | Remained the same                | 1103 (87.2%) |
|                |              | More likely                       | 325 (25.7%)        | 13 (1.0%)                                      | 47 (3.7%)         | 265 (20.9%) |                           | Increased willingness            | 74 (5.8%)    |
|                | Elderly      | Less likely                       | 96 (7.6%)          | 87 (6.9%)                                      | 7 (0.6%)          | 2 (0.2%)    | <0.001                    | Decreased willingness            | 211 (16.7%)  |
|                |              | Same for an adult                 | 1051 (83.1%)       | 153 (12.1%)                                    | 876 (69.2%)       | 22 (1.7%)   |                           | Remained the same                | 1023 (80.9%) |
|                |              | More likely                       | 118 (9.3%)         | 19 (1.5%)                                      | 39 (3.1%)         | 60 (4.7%)   |                           | Increased willingness            | 31 (2.5%)    |
| <b>HCW</b>     | Children     | Less likely                       | 5 (0.8%)           | 5 (0.8%)                                       | 0 (0.0%)          | 0 (0.0%)    | <0.001                    | Decreased willingness            | 33 (5.5%)    |
|                |              | Same for an adult                 | 432 (72.0%)        | 12 (2.0%)                                      | 378 (63.0%)       | 42 (7.0%)   |                           | Remained the same                | 525 (87.5%)  |
|                |              | More likely                       | 163 (27.2%)        | 7 (1.2%)                                       | 14 (2.3%)         | 142 (23.7%) |                           | Increased willingness            | 42 (7.0%)    |
|                | Elderly      | Less likely                       | 45 (7.5%)          | 44 (7.3%)                                      | 0 (0.0%)          | 1 (0.2%)    | <0.001                    | Decreased willingness            | 97 (16.2%)   |
|                |              | Same for an adult                 | 520 (86.7%)        | 84 (14.0%)                                     | 431 (71.8%)       | 5 (0.8%)    |                           | Remained the same                | 497 (82.8%)  |
|                |              | More likely                       | 35 (5.8%)          | 6 (1.0%)                                       | 7 (1.2%)          | 22 (3.7%)   |                           | Increased willingness            | 6 (1.0%)     |
| <b>Non-HCW</b> | Children     | Less likely                       | 33 (5.0%)          | 28 (4.2%)                                      | 5 (0.8%)          | 0 (0.0%)    | 0.006                     | Decreased willingness            | 55 (8.3%)    |
|                |              | Same for an adult                 | 469 (70.6%)        | 16 (2.4%)                                      | 426 (64.2%)       | 27 (4.1%)   |                           | Remained the same                | 577 (86.9%)  |
|                |              | More likely                       | 162 (24.4%)        | 6 (0.9%)                                       | 33 (5.0%)         | 123 (18.5%) |                           | Increased willingness            | 32 (4.8%)    |
|                | Elderly      | Less likely                       | 51 (7.7%)          | 43 (6.5%)                                      | 7 (1.1%)          | 1 (0.2%)    | <0.001                    | Decreased willingness            | 114 (17.2%)  |
|                |              | Same for an adult                 | 530 (79.8%)        | 69 (10.4%)                                     | 445 (67.0%)       | 16 (2.4%)   |                           | Remained the same                | 526 (79.2%)  |
|                |              | More likely                       | 83 (12.5%)         | 13 (2.0%)                                      | 32 (4.8%)         | 38 (5.7%)   |                           | Increased willingness            | 24 (3.6%)    |
| <b>Male</b>    | Children     | Less likely                       | 16 (2.9%)          | 14 (2.5%)                                      | 2 (0.4%)          | 0 (0.0%)    | 0.002                     | Decreased willingness            | 31 (5.5%)    |
|                |              | Same for an adult                 | 413 (73.9%)        | 10 (1.8%)                                      | 369 (66.0%)       | 34 (6.1%)   |                           | Remained the same                | 492 (88.0%)  |
|                |              | More likely                       | 130 (23.3%)        | 4 (0.7%)                                       | 17 (3.0%)         | 109 (19.5%) |                           | Increased willingness            | 36 (6.4%)    |
|                | Elderly      | Less likely                       | 46 (8.2%)          | 44 (7.9%)                                      | 1 (0.2%)          | 1 (0.2%)    | <0.001                    | Decreased willingness            | 91 (16.3%)   |
|                |              | Same for an adult                 | 464 (83.0%)        | 69 (12.3%)                                     | 384 (68.7%)       | 11 (2.0%)   |                           | Remained the same                | 455 (81.4%)  |
|                |              | More likely                       | 49 (8.8%)          | 6 (1.1%)                                       | 16 (2.9%)         | 27 (4.8%)   |                           | Increased willingness            | 13 (2.3%)    |
| <b>Female</b>  | Children     | Less likely                       | 18 (2.6%)          | 15 (2.2%)                                      | 3 (0.4%)          | 0 (0.0%)    | <0.001                    | Decreased willingness            | 53 (7.7%)    |
|                |              | Same for an adult                 | 477 (69.5%)        | 15 (2.2%)                                      | 428 (62.4%)       | 34 (5.0%)   |                           | Remained the same                | 596 (86.9%)  |
|                |              | More likely                       | 191 (27.8%)        | 9 (1.3%)                                       | 29 (4.2%)         | 153 (22.3%) |                           | Increased willingness            | 37 (5.4%)    |
|                | Elderly      | Less likely                       | 45 (6.6%)          | 38 (5.5%)                                      | 6 (0.9%)          | 1 (0.1%)    | <0.001                    | Decreased willingness            | 117 (17.1%)  |
|                |              | Same for an adult                 | 574 (83.7%)        | 82 (12.0%)                                     | 482 (70.3%)       | 10 (1.5%)   |                           | Remained the same                | 552 (80.5%)  |
|                |              | More likely                       | 67 (9.8%)          | 13 (1.9%)                                      | 22 (3.2%)         | 32 (4.7%)   |                           | Increased willingness            | 17 (2.5%)    |
|                |              |                                   | <i>133 (19.4%)</i> | <i>510 (74.3%)</i>                             | <i>43 (6.3%)</i>  |             |                           |                                  |              |

**Supplementary Table 4: Results for Question 10 (“How would the age of the individual having a cardiac arrest impact your willingness to perform CPR?”), Overall and Within Subgroups**

<sup>a</sup> Answers for are categorized based on the “Response before COVID” answer, with the fourth row of each section (in *italics*) being the sum

<sup>b</sup> “Increased willingness” includes shifting from: *less likely* to *same as for an adult* or *more likely* to intervene; or *same as for an adult* to *more likely*.  
“Decreased willingness: indicates shifting from: *more likely* to *same as for an adult* or *less likely* to intervene; or neutral or *less likely*.  
HCW, Healthcare Worker
